# Supplementary material for: Effects of Titanium Mesh Surfaces-Coated with Hydroxyapatite/β-Tricalcium Phosphate Nanotubes on Acetabular Bone Defects in Rabbits
Source: MDPI journal article supplement (doi:10.3390/ijms18071462), 2017-07-07
Supplement: s1 [file s1]

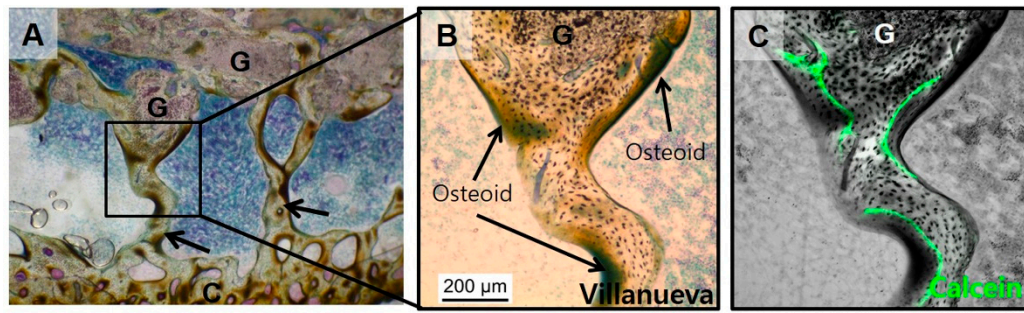

**Figure S1.** (A) The formation of bone bridges from below the cortical bone layer to the grafting materials at eight weeks post-operation (30×, Villanueva bone staining). (B) High magnification of the rectangle shown in (A) (100×). (C) Calcein labeling at the same position as that in (B) (100×). Arrows: bone bridges, G: grafting materials, C: opposite cortical bone layer.
